# Supplementary material
Source: publisher figshare collection journal article supplement (https://sage.figshare.com/ndownloader/files/23117102)
Supplement: Supplementary file [file 23117102]

## **Risk factors for intracerebral hemorrhage – results from a prospective population-based study**

Edith H. Svensson, MD<sup>1</sup>  
Kasim Abul-Kasim, MD, PhD<sup>2,3</sup>  
Gunnar Engström, MD, PhD<sup>1</sup>  
Martin Söderholm, MD, PhD<sup>1,4</sup>

1. Department of Clinical Sciences in Malmö, Lund University, Sweden
2. Radiology Diagnostics, Department of Translational Medicine, Malmö, Lund University, Sweden
3. Department of Radiology, Skåne University Hospital, Lund and Malmö, Sweden
4. Department of Neurology, Skåne University Hospital, Lund and Malmö, Sweden

Corresponding Author: Edith H. Svensson  
**edith.svensson@med.lu.se**

**Table 1. Hazard ratios for associations with lobar and non-lobar ICH**

|                                           | <b>Lobar ICH, age- and sex-adjusted<br/>HR (95 % CI)</b> | <b>Lobar ICH, multivariable adjusted*<br/>HR (95 % CI)</b> | <b>Non-lobar ICH, age- and sex-adjusted<br/>HR (95 % CI)</b> | <b>Non-lobar ICH, multivariable adjusted*<br/>HR (95 % CI)</b> |
|-------------------------------------------|----------------------------------------------------------|------------------------------------------------------------|--------------------------------------------------------------|----------------------------------------------------------------|
| Systolic BP, per 10 mmHg                  | 1.11 (1.01–1.22)                                         | 1.13 (1.02–1.24)                                           | 1.23 (1.14–1.34)                                             | 1.22 (1.12–1.33)                                               |
| Diastolic BP, per 10 mmHg                 | 1.10 (0.91–1.33)                                         | 1.14 (0.94–1.39)                                           | 1.60 (1.37–1.87)                                             | 1.59 (1.35–1.88)                                               |
| Hypertension                              | 1.47 (0.94–2.28)                                         | 1.51 (0.97–2.37)                                           | 2.47 (1.60–3.83)                                             | 2.44 (1.57–3.80)                                               |
| Diabetes mellitus                         | 0.58 (0.19–1.85)                                         | 0.58 (0.18–1.84)                                           | 2.19 (1.24–3.88)                                             | 1.97 (1.10–3.53)                                               |
| Current smoking                           | 1.55 (1.04–2.31)                                         | 1.57 (1.04–2.36)                                           | 1.16 (0.80–1.67)                                             | 1.20 (0.82–1.75)                                               |
| High alcohol intake                       | 1.75 (0.81–3.79)                                         | 1.65 (0.76–3.60)                                           | 1.36 (0.66–2.79)                                             | 1.26 (0.61–2.61)                                               |
| Educational level†                        |                                                          |                                                            |                                                              |                                                                |
| Secondary                                 | 1.21 (0.76–1.94)                                         | 1.23 (0.77–1.96)                                           | 1.02 (0.66–1.57)                                             | 1.03 (0.66–1.61)                                               |
| University                                | 0.68 (0.34–1.35)                                         | 0.71 (0.35–1.42)                                           | 1.10 (0.68–1.78)                                             | 1.21 (0.74–1.98)                                               |
| Living alone                              | 0.93 (0.60–1.43)                                         | 0.89 (0.58–1.38)                                           | 1.44 (1.01–2.05)                                             | 1.43 (1.002–2.04)                                              |
| BMI ‡                                     |                                                          |                                                            |                                                              |                                                                |
| <18.5 kg/m <sup>2</sup>                   | 1.56 (0.38–6.39)                                         | 1.53 (0.37–6.32)                                           | –                                                            | –                                                              |
| 25–30 kg/m <sup>2</sup>                   | 0.69 (0.46–1.04)                                         | 0.69 (0.46–1.05)                                           | 1.09 (0.77–1.56)                                             | 1.07 (0.75–1.53)                                               |
| >30 kg/m <sup>2</sup>                     | 0.84 (0.48–1.46)                                         | 0.81 (0.46–1.43)                                           | 1.26 (0.78–2.02)                                             | 1.07 (0.66–1.75)                                               |
| Waist circumference §                     | 0.87 (0.51–1.49)                                         | 0.84 (0.48–1.45)                                           | 1.08 (0.69–1.70)                                             | 0.90 (0.57–1.44)                                               |
| Low physical activity                     | 1.36 (0.91–2.03)                                         | 1.38 (0.92–2.07)                                           | 0.96 (0.66–1.41)                                             | 1.10 (0.65–1.40)                                               |
| Apolipoprotein A1 (per 10 mg/dL increase) | 0.97 (0.90–1.04)                                         | 0.96 (0.89–1.04)                                           | 0.95 (0.89–1.02)                                             | 0.95 (0.89–1.02)                                               |
| Apolipoprotein B (per 10 mg/dL increase)  | 0.95 (0.88–1.03)                                         | 0.94 (0.87–1.02)                                           | 0.99 (0.93–1.05)                                             | 0.97 (0.91–1.04)                                               |
| Use of oral anticoagulants                | 7.36 (3.21–16.89)                                        | 8.18 (3.48–19.20)                                          | 1.89 (0.47–7.67)                                             | 1.92 (0.47–7.85)                                               |

ICH, intracerebral hemorrhage; HR, hazard ratio; CI, confidence interval; BP, blood pressure;

BMI, body mass index; ApoB, apolipoprotein B; ApoA1, apolipoprotein A1.

\* Main model adjusts for age, sex, systolic BP, use of BP-lowering drugs, current smoking, high alcohol intake, use of oral anticoagulants, diabetes mellitus, BMI and living alone. ApoA1 and ApoB also adjusted for lipid-lowering drugs. Diastolic BP not adjusted for systolic BP. Waist circumference not adjusted for BMI.

† Secondary (10–12 years) and university (>12 years) education compared to primary education ( $\leq 9$  years).

‡ Compared to reference group (18.5–25 kg/m<sup>2</sup>)

§ 4<sup>th</sup> compared to 1<sup>st</sup> sex-specific quartile.
